# Supplementary material for: Photochemical interactions between n-Ag2S and n-TiO2 amplify their bacterial stress response
Source: Royal Society of Chemistry journal article supplement (doi:10.1039/c8en01159a), 2018-12-10
Supplement: c8en01159a1.pdf [file c8en01159a1.pdf]

# Photochemical interactions between n-Ag<sub>2</sub>S and n-TiO<sub>2</sub> amplify their bacterial stress response

## Supporting information

*Carolyn M. Wilke<sup>1</sup>, Claire Petersen<sup>1</sup>, Marco A. Alsina<sup>1,2</sup>, Jean-François Gaillard<sup>1\*</sup>, and  
Kimberly A. Gray<sup>1\*</sup>*

<sup>1</sup>Department of Civil and Environmental Engineering, Northwestern University, 2145 Sheridan  
Road, Evanston, IL, 60208

<sup>2</sup> Current address: Department of Construction Engineering and Management, University of  
Talca, Camino Los Niches Km.1, Curicó, Región del Maule, Chile

\*Corresponding authors: Kimberly A. Gray and Jean-François Gaillard

Email: [k-gray@northwestern.edu](mailto:k-gray@northwestern.edu), [jf-gaillard@northwestern.edu](mailto:jf-gaillard@northwestern.edu)

Phone: (847)-467-4252, (847)-467-1376

Fax: (847)-491-4011, (847)-491-4011

|                                             | Chemical components (mM)        |                                 |                                |                               |                                |                                              |                                             |                                 |                                           |                   | pH <sup>(h)</sup> |
|---------------------------------------------|---------------------------------|---------------------------------|--------------------------------|-------------------------------|--------------------------------|----------------------------------------------|---------------------------------------------|---------------------------------|-------------------------------------------|-------------------|-------------------|
| DOC <sup>(a)</sup><br>(mg L <sup>-1</sup> ) | Ca <sup>2+</sup> <sup>(b)</sup> | Mg <sup>2+</sup> <sup>(b)</sup> | Na <sup>+</sup> <sup>(c)</sup> | K <sup>+</sup> <sup>(c)</sup> | Cl <sup>-</sup> <sup>(d)</sup> | SO <sub>4</sub> <sup>2-</sup> <sup>(d)</sup> | NO <sub>3</sub> <sup>-</sup> <sup>(d)</sup> | ΣPO <sub>4</sub> <sup>(e)</sup> | Alk <sup>(f)</sup><br>meq L <sup>-1</sup> | IS <sup>(g)</sup> |                   |
| 2.41<br>±0.08                               | 0.76<br>±0.07                   | 0.41<br>±0.04                   | 0.36<br>±0.02                  | 0.035<br>±0.001               | 0.32<br>±0.05                  | 0.21<br>±0.06                                | 0.022<br>±0.009                             | BDL <sup>(i)</sup>              | 1.92<br>±0.04                             | 5.4<br>±0.4       | 8.1<br>±0.1       |

(a) DOC: dissolved organic carbon, measured on high-temperature combustion total organic carbon analyzer (Dohrmann Series Apollo 9000)

(b) Ca<sup>2+</sup>, Mg<sup>2+</sup> measured by flame atomic absorbance spectroscopy (Perkin Elmer PinAAcle 500)

(c) Na<sup>+</sup>, K<sup>+</sup> measured by flame atomic emission spectroscopy (GBC 932 AA)

(d) Cl<sup>-</sup>, SO<sub>4</sub><sup>2-</sup>, NO<sub>3</sub><sup>-</sup> measured by ion chromatography (Methrom Compact IC pro Unit #881)

(e) ΣPO<sub>4</sub>, or soluble reactive phosphorus, measured by colorimetry after reaction with molybdate <sup>1,2</sup>, detection limit ~ 1 μM

(f) Alk: alkalinity, measured by computerized titration using a MacIntosh ME-10 unit, a Thermo™ Scientific Orion Glass Body ROSS™ Combination Electrode, and 0.1000(+/- 0.0005) N hydrochloric acid.

(g) IS: ionic strength on the mM unit basis.

(h) measured using a Thermo™ Scientific Orion Glass Body ROSS™ Semi Micro Combination Electrode and an Accumet Research AR20 pH meter using NIST buffer solutions for calibration.

(i) BDL: Below detection limit

**Table S1:** Chemical characteristics of Lake Michigan Water. All measurements were done in triplicate and reported values are average ± standard deviation. This table was published in the ESI of Wilke, et al. ([Environ. Sci.: Nano](#), 2018, **5**, 96-102)<sup>3</sup>

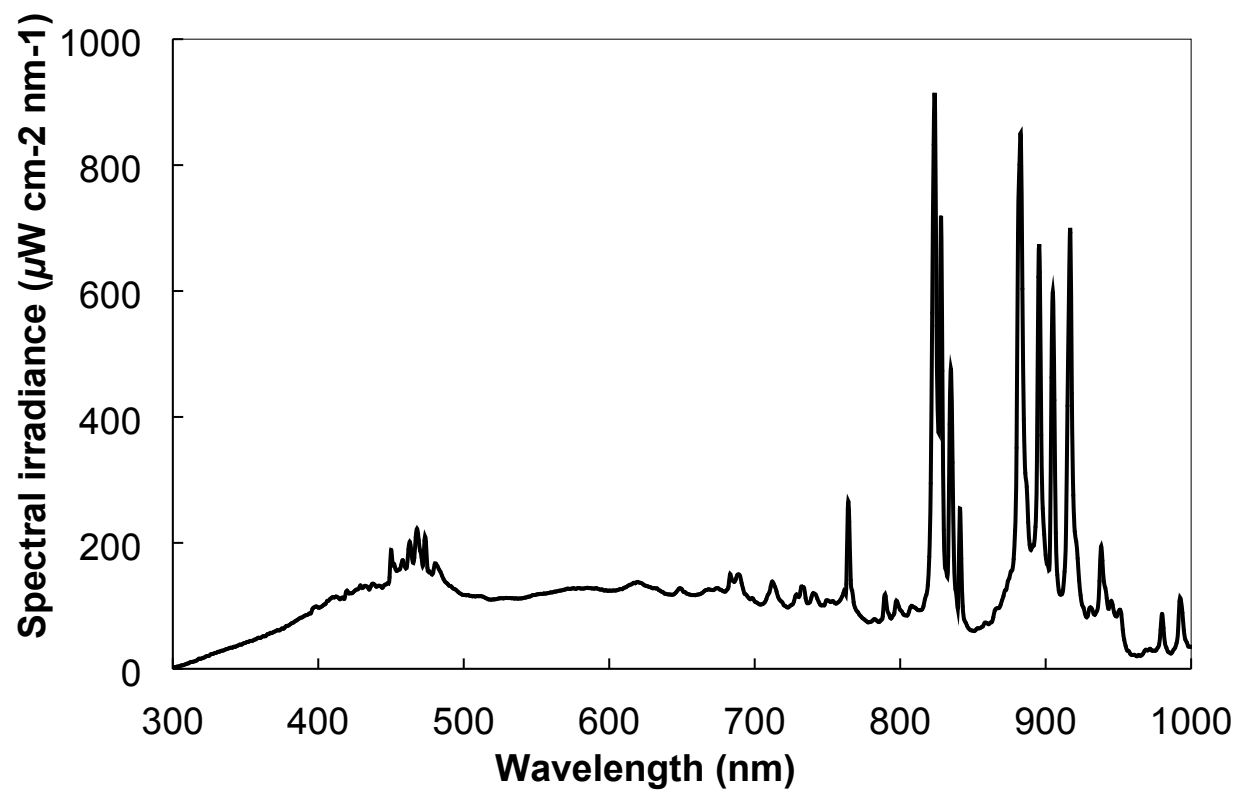

**Figure S1:** Spectrum of simulated solar irradiation from Xe arc lamp (900W).

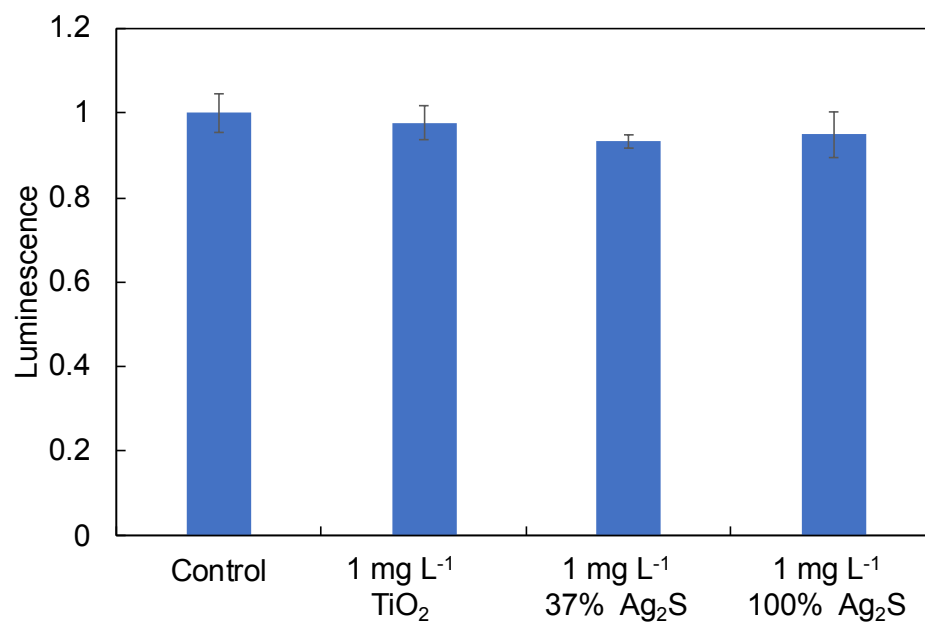

**Figure S2:** Potential interferences with NMs for the ATP assay. Significant differences were not observed between NMs and the control (based on  $p < 0.05$ ).

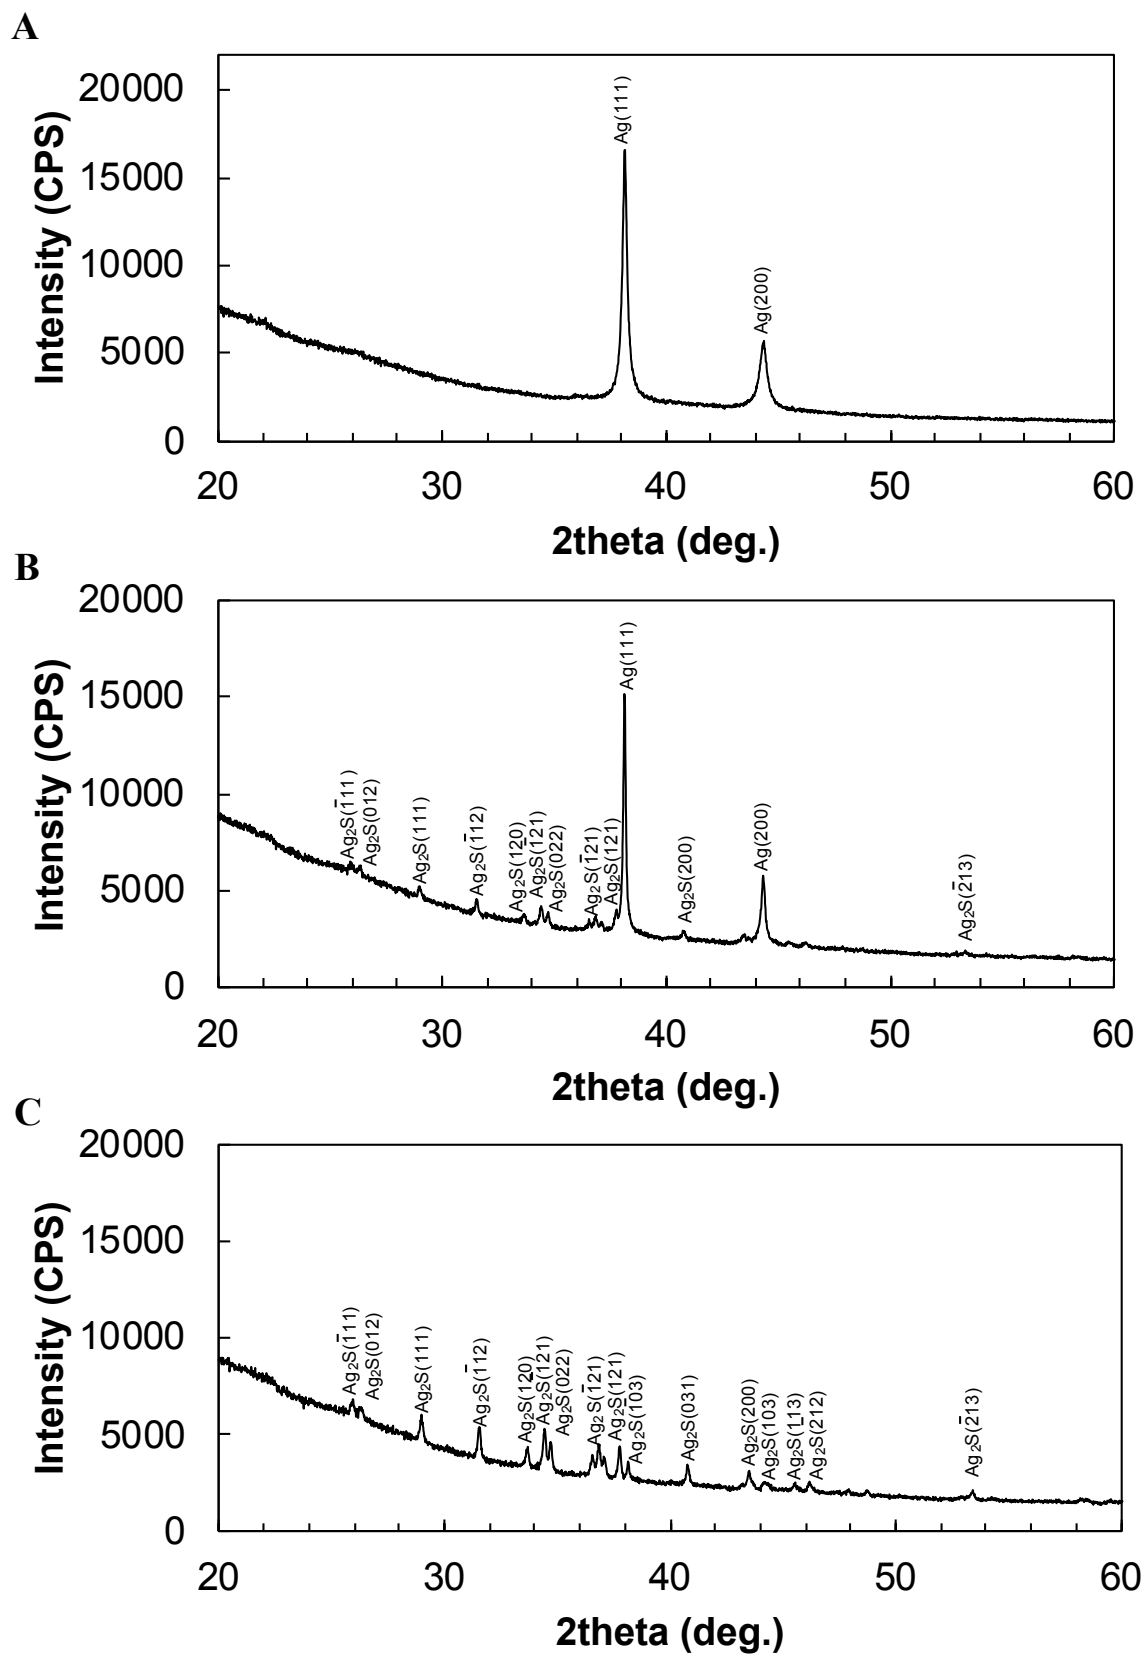

**Figure S3:** X-ray diffractograms for (A)n-Ag, (B) 37% Ag<sub>2</sub>S, and (C) 100% Ag<sub>2</sub>S.

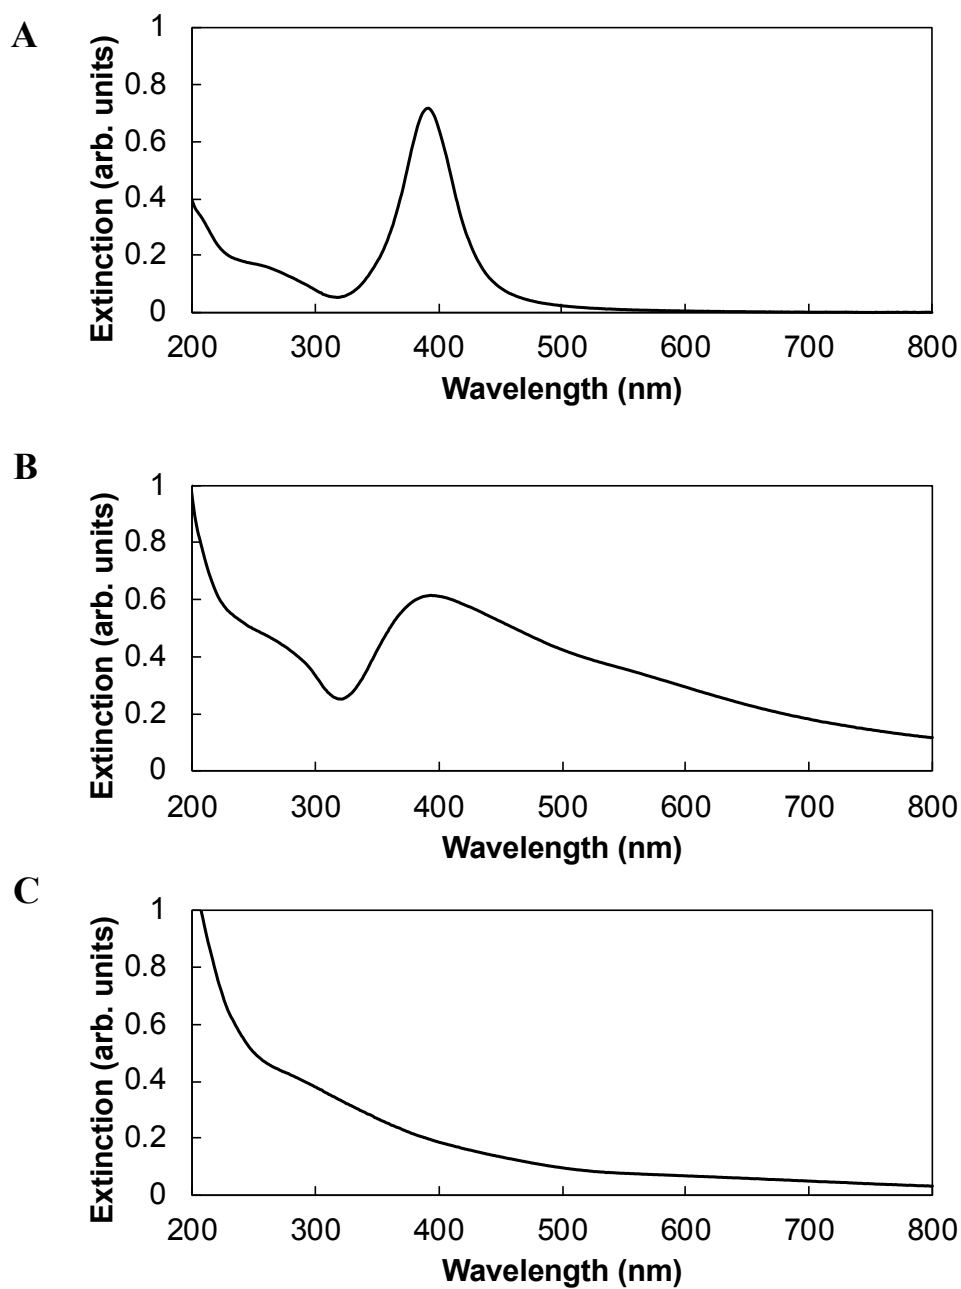

**Figure S4:** UV-vis extinction spectra of Ag-containing NMs. (A) n-Ag, 40 fold dilution (B) 37% Ag<sub>2</sub>S, 10 fold dilution (C) 100% Ag<sub>2</sub>S, 10 fold dilution.

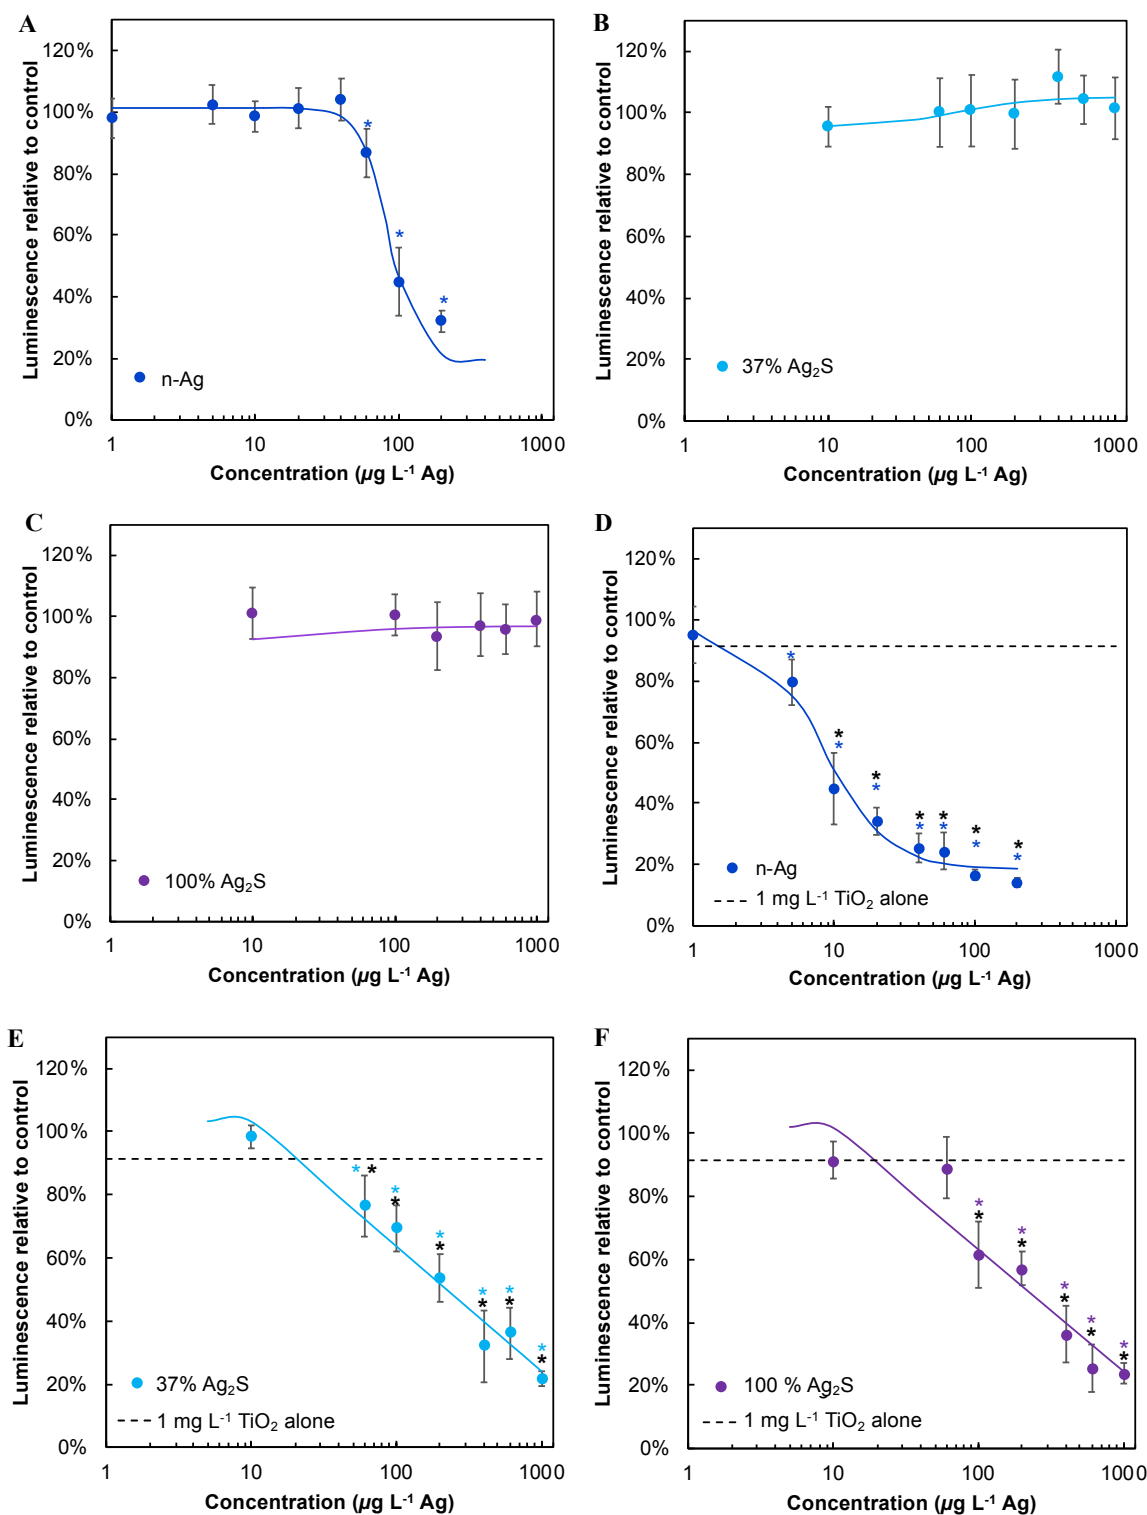

**Figure S5:** Effect of n-Ag, or partially or fully sulfidized n-Ag on bacterial ATP under simulated solar irradiation reproduced from main text (A-C) without n-TiO<sub>2</sub> or (D-F) with 1 mg/L n-TiO<sub>2</sub> (dashed line shows n-TiO<sub>2</sub> alone for comparison). Statistical significance ( $p < 0.05$ ) for values compared with control is shown by asterisks in same color as dataset. For tests with TiO<sub>2</sub>, statistical significance compared with n-TiO<sub>2</sub> alone is shown by black asterisk.

| <b>Ag-containing NM</b> | <b>Concentration of stock (as Ag, ppm)</b> | <b>Morphology</b>                                | <b>Primary size (nm)</b> | <b>Hydrodynamic diameter (nm)</b> | <b>Zeta potential (mV)</b> |
|-------------------------|--------------------------------------------|--------------------------------------------------|--------------------------|-----------------------------------|----------------------------|
| citrate n-Ag            | 219 ± 6                                    | spherical                                        | 13 ± 7                   | 18.3±0.1                          | -27.0 ± 2.6                |
| 37% Ag <sub>2</sub> S   | 160 ± 2                                    | spherical, with bridges formed between particles | 38 ±18                   | 40.8 ±0.4                         | -29.9± 1.2                 |
| 100% Ag <sub>2</sub> S  | 139 ± 2                                    | spherical, with bridges formed between particles | 17 ± 11                  | 55.0± 1.1                         | -32.8± 3.2                 |

**Table S2:** Characterization of Ag-containing NMs



## References

1. Stainton, M.; Capel, M.; Armstrong, F., Chemical analysis of fresh water. Mar. Serv. Misc. Spec. Pub. #25. **1977**, 166 p.
2. Murphy, J.; Riley, J. P., A modified single solution method for the determination of phosphate in natural waters. *Anal. Chim. Acta* **1962**, 27, 31-36.
3. Wilke, C. M.; Gaillard, J.-F.; Gray, K. A., The critical role of light in moderating microbial stress due to mixtures of engineered nanomaterials. *Environ. Sci. Nano.* **2018**.
